# Supplementary material for: Inequalities in Access and Utilization of Maternal, Newborn and Child Health Services in sub-Saharan Africa: A Special Focus on Urban Settings
Source: Springer Nature journal article supplement (doi:10.1007/s10995-021-03250-z), 2021-10-15
Supplement: 10995_2021_3250_MOESM1_ESM.pdf [file 10995_2021_3250_MOESM1_ESM.pdf]

## Search strategy

|                                                                                                                                                                                                                                                                                                                    |                                          |                        |                                                                 |               |                          |                |                             |                                  |
|--------------------------------------------------------------------------------------------------------------------------------------------------------------------------------------------------------------------------------------------------------------------------------------------------------------------|------------------------------------------|------------------------|-----------------------------------------------------------------|---------------|--------------------------|----------------|-----------------------------|----------------------------------|
| <b>Domain:</b><br>Adults in SSA (both general population and women)                                                                                                                                                                                                                                                | <b>Determinant:</b><br>Aspects of equity |                        | <b>Outcome:</b><br>Access to maternal and child health services |               |                          |                |                             |                                  |
|                                                                                                                                                                                                                                                                                                                    | <b>OR (1)</b>                            |                        |                                                                 |               |                          |                |                             |                                  |
| <b>Sub-Saharan Africa</b>                                                                                                                                                                                                                                                                                          | SES                                      | Health equity          | Healthcare accessibility                                        | Affordability | Maternal health services | Postnatal      | Skilled delivery            | Child health services            |
| <b>SSA Countries:</b><br>Benin, Botswana, Burkina Faso, Cameroun, Congo (Bazaville), Congo (DRC), Ethiopia, Ghana, Guinea, Ivory Coast, Kenya, Lesotho, Madagascar, Malawi, Mauritius, Mozambique, Namibia, Niger, Nigeria, Rwanda, Senegal, Sierra Leone, South Africa, Swaziland, Tanzania, Togo, Uganda, Zambia | Wealth                                   | Healthcare disparities | Healthcare availability                                         | Affordable    | Antenatal                | Postnatal care | Assisted delivery           | Immuniz*                         |
|                                                                                                                                                                                                                                                                                                                    | Income                                   |                        |                                                                 |               | Antenatal care           | PNC            | Traditional birth attendant | Vaccinat*                        |
|                                                                                                                                                                                                                                                                                                                    | Education                                |                        |                                                                 |               | ANC                      | Postpartum     | TBA                         | Breastfeeding                    |
|                                                                                                                                                                                                                                                                                                                    |                                          |                        |                                                                 |               | Prenatal education       |                | Midwif*                     | Infant and young child nutrition |
|                                                                                                                                                                                                                                                                                                                    |                                          |                        |                                                                 |               | Prenatal care            |                | Midwiv*                     |                                  |
|                                                                                                                                                                                                                                                                                                                    |                                          |                        |                                                                 |               | Prenatal                 |                |                             |                                  |

|                                   |                              |                      |                                      |  |                           |                                 |                            |                                                |
|-----------------------------------|------------------------------|----------------------|--------------------------------------|--|---------------------------|---------------------------------|----------------------------|------------------------------------------------|
|                                   |                              |                      |                                      |  | Perinatal care            |                                 |                            |                                                |
|                                   |                              |                      |                                      |  | Supplement *              |                                 |                            |                                                |
|                                   |                              |                      |                                      |  | Medication                |                                 |                            |                                                |
|                                   |                              |                      |                                      |  |                           |                                 |                            |                                                |
|                                   |                              |                      |                                      |  |                           |                                 |                            |                                                |
| <b>MESH TERMS</b>                 |                              |                      |                                      |  |                           |                                 |                            |                                                |
| Africa South of the Sahara"[Mesh] | Socioeconomic Factors [Mesh] | Health Equity [Mesh] | Healthcare Disparities [Mesh]        |  | Prenatal Education [Mesh] | Maternal Health Services [Mesh] | Delivery, Obstetric [Mesh] | "Vaccination/administration and dosage"[Major] |
|                                   |                              |                      | Health Services Accessibility [Mesh] |  |                           |                                 | Midwifery [Mesh]           | "Vaccination/therapy"[Major]                   |
|                                   |                              |                      |                                      |  |                           |                                 |                            | "Immunization/administrati                     |

|  |  |  |  |  |  |  |  |                                              |
|--|--|--|--|--|--|--|--|----------------------------------------------|
|  |  |  |  |  |  |  |  | on and dosage"[Major]                        |
|  |  |  |  |  |  |  |  | "Immunization/therapy"[Major]                |
|  |  |  |  |  |  |  |  | "Immunization/prevention and control"[Major] |

## Combinations of Terms/Keywords – PubMed

#16,"(#7 OR #15)"

#15,"(#8 AND #14)"

#14,"(#12 AND #13)"

#13,"(#9 OR #10 OR #11)"

#12,"(maternal health services OR antenatal care OR antenatal OR prenatal care OR prenatal education OR prenatal OR maternal-child health services OR postnatal care OR postpartum care OR obstetric delivery OR assisted delivery OR traditional birth attendant OR midwife OR midwives OR community health workers OR child health services OR immuniz\* OR vaccinat\*)"

#11,"(health equity OR healthcare disparit\* OR healthcare accessibility OR healthcare availability OR affordability)"

#10,"(health equity OR health\* disparit\* OR healthcare accessibility OR healthcare availability OR healthcare affordability)"

#9,"(socioeconomic status OR wealth OR income OR poverty OR education)"

#8,"(Benin[Title/Abstract] OR Botswana[Title/Abstract] OR Burkina Faso[Title/Abstract] OR Cameroun[Title/Abstract] OR Cameroon[Title/Abstract] OR Congo[Title/Abstract] OR Congo, Ethiopia[Title/Abstract] OR Ghana[Title/Abstract] OR Guinea[Title/Abstract] OR Ivory Coast[Title/Abstract] OR Kenya[Title/Abstract] OR Lesotho[Title/Abstract] OR Madagascar[Title/Abstract] OR Malawi[Title/Abstract] OR Mauritius[Title/Abstract] OR Mozambique[Title/Abstract] OR Namibia[Title/Abstract] OR Niger[Title/Abstract] OR Nigeria[Title/Abstract] OR Rwanda[Title/Abstract] OR Senegal[Title/Abstract] OR Sierra Leone[Title/Abstract] OR South Africa[Title/Abstract] OR Swaziland[Title/Abstract] OR Tanzania[Title/Abstract] OR Togo[Title/Abstract] OR Uganda[Title/Abstract] OR Zambia[Title/Abstract])",261734,10:07:37

#7,"(#1 AND #3 AND #6)"

#6,"(#3 OR #4)"

#5,"(#1 AND #2 AND #3)"

#4,"( ( ""Vaccination/administration and dosage""[Majr] OR ""Vaccination/therapeutic use""[Majr] ) ) OR ( ""Immunization/administration and dosage""[Mesh] OR ""Immunization/prevention and control""[Mesh] OR ""Immunization/therapeutic use""[Mesh] OR ""Immunization/therapy""[Mesh] )"

#3,"((( ""Maternal Health Services""[Mesh] ) OR ""Prenatal Education""[Mesh] ) OR ""Delivery, Obstetric""[Mesh] ) OR ""Midwifery""[Mesh]"

#2,"((( ""Socioeconomic Factors""[Mesh] ) OR ""Health Equity""[Mesh] ) OR ""Healthcare Disparities""[Mesh] ) OR ""Health Services Accessibility""[Mesh]",510000,08:45:36

#1,""Africa South of the Sahara""[Mesh] or"

## Search strategy – for other databases including PopLine

maternal healthcare OR antenatal care OR postnatal care OR midwifery OR postpartum OR birth OR skilled delivery OR assisted delivery OR perinatal care OR maternal and childcare OR immunization OR vaccination OR obstetric delivery OR assisted delivery OR delivery

**AND**

healthcare accessibility OR healthcare disparities OR health equity OR socioeconomic status OR poverty OR wealth

**AND**

Africa sub Saharan

1

(( ( ( healthcare accessibility OR healthcare disparities OR health equity OR socioeconomic status OR poverty OR wealth ) AND ( maternal healthcare OR antenatal care OR postnatal care OR midwifery OR postpartum OR birth OR skilled delivery OR assisted delivery OR perinatal care OR maternal and childcare OR immunization OR vaccination OR obstetric delivery OR assisted delivery OR delivery ) ) AND ( ( Taxonomy term IDs from the <em class="placeholder">Region/Country</em> vocabulary: Africa Sub Saharan ) ) ) AND ( ( Taxonomy term IDs from the <em class="placeholder">Language</em> vocabulary: English ) AND ( is\_field\_document\_year\_int: [2000 TO 2018] ) )
