# Supplementary material for: Inequalities in Access and Utilization of Maternal, Newborn and Child Health Services in sub-Saharan Africa: A Special Focus on Urban Settings
Source: Springer Nature journal article supplement (doi:10.1007/s10995-021-03250-z), 2021-10-15
Supplement: 10995_2021_3250_MOESM2_ESM.pdf [file 10995_2021_3250_MOESM2_ESM.pdf]

|                                       |                                                                                                                           |                                                |  |  |  |  |  |  |     |     |     |  |  |    |  |     |    |  |      |
|---------------------------------------|---------------------------------------------------------------------------------------------------------------------------|------------------------------------------------|--|--|--|--|--|--|-----|-----|-----|--|--|----|--|-----|----|--|------|
| Tann et al, BMC Preg Childbirth, 2007 | Use of antenatal services and delivery care in Entebbe, Uganda: a community survey                                        | cross-sectional retrospective community survey |  |  |  |  |  |  | NA  | NA  | N/A |  |  | NA |  | N/A | NA |  | Good |
| Sanni et al, Int Health, 2018         | Factors associated with maternal utilization of health facilities for delivery in Ethiopia                                | Cross-sectional ; 2011 DHS                     |  |  |  |  |  |  | NA  | NA  | N/A |  |  | NA |  | N/A | NA |  | Good |
| Ngandu et al, BMJ Open, 2017          | Wealth-related inequality in early uptake of HIV testing among pregnant women: an analysis of data from a national cross- | Cross-sectional survey, 2012 PMTCT programme   |  |  |  |  |  |  | N/A | N/A | N/A |  |  | NA |  | N/A | NA |  | Good |





|                                                |                                                                                                                  |                                             |  |  |  |  |  |    |    |    |  |    |  |     |    |  |      |
|------------------------------------------------|------------------------------------------------------------------------------------------------------------------|---------------------------------------------|--|--|--|--|--|----|----|----|--|----|--|-----|----|--|------|
| Mekonnen & Mekonnen, J Health Popul Nutr, 2003 | Factors Influencing the Use of Maternal Healthcare Services in Ethiopia                                          | 2000 Ethiopia Demographic and Health Survey |  |  |  |  |  | NA | NA | NA |  | NA |  | N/A | NA |  | Fair |
| Owiti et al, Pan African Medical Journal, 2018 | Utilization of Kenya's free maternal health services among women living in Kibera slums: a cross-sectional study | Cross-sectional                             |  |  |  |  |  | NA | NA |    |  | NA |  | N/A | NA |  | Good |
| Adewuyi et al, PLOS ONE, 2018                  | Prevalence and factors associated with underutilization of antenatal care services in Nigeria: A                 | 2013 Nigeria Demographic and Health Survey  |  |  |  |  |  | NA | NA | NA |  | NA |  | N/A | NA |  | Good |



|                                                                          |                                                                                                                                |                                                                                                                                                      |  |  |  |  |    |     |     |     |     |     |    |     |     |    |  |  |             |
|--------------------------------------------------------------------------|--------------------------------------------------------------------------------------------------------------------------------|------------------------------------------------------------------------------------------------------------------------------------------------------|--|--|--|--|----|-----|-----|-----|-----|-----|----|-----|-----|----|--|--|-------------|
| Machira and Palamuleni, Journal of Egypt Public Health Association, 2017 | The factors associated with women's use of postpartum care services in urban areas as compared with the rural areas in Malawi. | 2010 Malawi Demographic and Health Survey data which is the national representative survey of women in the reproductive age between 15 and 49 years. |  |  |  |  |    |     | N/A | N/A | N/A |     | NA |     | N/A | NA |  |  | <b>Good</b> |
| Engodi et al, IJEH, 2015                                                 | Determinants of immunization inequality among urban poor children: evidence from Nairobi's informal settlements                | Nairobi Cross-Sectional Slum Survey of 2012                                                                                                          |  |  |  |  | NR | N/A | N/A | N/A | NR  | N/A | NR | N/A | NA  |    |  |  | <b>Fair</b> |



|                                                     |                                                                                                                                                             |                                   |  |  |  |  |  |  |     |     |     |    |     |    |     |    |  |  |             |
|-----------------------------------------------------|-------------------------------------------------------------------------------------------------------------------------------------------------------------|-----------------------------------|--|--|--|--|--|--|-----|-----|-----|----|-----|----|-----|----|--|--|-------------|
| Phiri et al, BMC Preg Childbirth, 2014              | Factors associated with health facility childbirth in districts of Kenya, Tanzania and Zambia: a population based survey                                    | A population-based survey in 2007 |  |  |  |  |  |  | N/A | N/A | N/A |    | N/A |    | N/A | NA |  |  | <b>Fair</b> |
| Fotso, Ezeh & Oranje; Journal of Urban Health, 2008 | Describe the provision of obstetric care in the Nairobi informal settlements; (2) describe the patterns of antenatal and delivery care, notably in terms of | Cross-sectional                   |  |  |  |  |  |  | N/A | N/A | N/A | NR | N/A | NR | N/A | NA |  |  | <b>Good</b> |



|                                         |                                                                                                                                                         |                                                                      |  |  |  |  |     |     |     |     |  |     |  |     |     |  |             |
|-----------------------------------------|---------------------------------------------------------------------------------------------------------------------------------------------------------|----------------------------------------------------------------------|--|--|--|--|-----|-----|-----|-----|--|-----|--|-----|-----|--|-------------|
|                                         | pregnant refugee women and local South African pregnant women                                                                                           |                                                                      |  |  |  |  |     |     |     |     |  |     |  |     |     |  |             |
| Aidam et al EJCN, 2005                  | Assess factors associated with exclusive breastfeeding (EBF) in Accra, Ghana                                                                            | Cross-sectional                                                      |  |  |  |  | NR  | N/A | CD  | N/A |  | N/A |  | N/A | N/A |  | <b>Fair</b> |
| Bellows et al, Health Policy Plan, 2012 | Measure the association between the introduction of an output-based voucher programme and the odds of a facility-based delivery in two Nairobi informal | Cross-sectional analysis of the 2004 - 2005 & 2006-2008 NUDHS S data |  |  |  |  | RNR | N/A | N/A | N/A |  | N/A |  | N/A | N/A |  | <b>Fair</b> |

|                                            |                                                                                                                                      |                                                   |  |  |  |  |       |     |     |     |  |     |  |     |     |  |             |
|--------------------------------------------|--------------------------------------------------------------------------------------------------------------------------------------|---------------------------------------------------|--|--|--|--|-------|-----|-----|-----|--|-----|--|-----|-----|--|-------------|
|                                            | settlements.                                                                                                                         |                                                   |  |  |  |  |       |     |     |     |  |     |  |     |     |  |             |
| Olusanya, Alakija, Inem, J Biosc Sci, 2010 | Establish the pattern and uptake of maternity services and associated factors against the backdrop of rapid urbanization in Nigeria. | Cross-sectional                                   |  |  |  |  | N/R** | N/A | N/A | N/A |  | N/A |  | N/A | N/A |  | <b>Good</b> |
| Rossier et al, Global Health Action, 2014  | To assess MH utilization in Nairobi and Ouagadougou                                                                                  | Cross-sectional analysis of 2009 - 2011 HDSS data |  |  |  |  | NR    | N/A | N/A | N/A |  | N/A |  | N/A | N/A |  | <b>Good</b> |
| Belayneh, Adefris and Andargie, 2014       | Assess timing of ANC booking and associated factors                                                                                  | Hospital-based cross-sectional study              |  |  |  |  |       | N/A | N/A | N/A |  | N/A |  | N/A | N/A |  | <b>Fair</b> |

|                                                  |                                                                                                             |                                                                  |  |  |  |  |  |     |     |     |  |     |  |     |     |             |
|--------------------------------------------------|-------------------------------------------------------------------------------------------------------------|------------------------------------------------------------------|--|--|--|--|--|-----|-----|-----|--|-----|--|-----|-----|-------------|
|                                                  | among pregnant women attending ANC clinic at University of Gondar Hospital, 2013                            |                                                                  |  |  |  |  |  |     |     |     |  |     |  |     |     |             |
| Babirye et al, BMC Health Services Research 2014 | Urban settings do not ensure access to services: findings from the immunisation programme in Kampala Uganda | Mixed methods approach (quantitative and Qualitative collected ) |  |  |  |  |  | N/A | N/A | N/A |  | N/A |  | N/A | N/A | <b>Good</b> |
| Fatiregun et al, Vaccine, 2011                   | Maternal determinants of complete child immunization among children aged 12–23 months in a southern         | A cross sectional study design                                   |  |  |  |  |  | N/A | N/A | N/A |  | N/A |  | N/A | N/A | <b>Good</b> |

|                                                          |                                                                                                                                    |                                |  |  |  |  |  |     |     |     |  |  |     |  |  |  |      |
|----------------------------------------------------------|------------------------------------------------------------------------------------------------------------------------------------|--------------------------------|--|--|--|--|--|-----|-----|-----|--|--|-----|--|--|--|------|
|                                                          | district of Nigeria                                                                                                                |                                |  |  |  |  |  |     |     |     |  |  |     |  |  |  |      |
| Idowu et al., Ethiopian journal of health sciences, 2017 | Determinants of Skilled Care Utilization among Pregnant Women Residents in an Urban Community in Kwara State, Northcentral Nigeria | A cross sectional study design |  |  |  |  |  | N/A | N/A | N/A |  |  | N/A |  |  |  | Good |
| Demilew, BMC Res Notes, 2017                             | Factors associated with mothers' knowledge on infant and young child feeding recommendation in slum areas of Bahir                 | A cross sectional study design |  |  |  |  |  | N/A | N/A | N/A |  |  | N/A |  |  |  | Good |









|                                                                        |                                                                                                                                              |                                 |  |  |  |  |  |    |     |     |     |  |     |  |     |     |  |             |
|------------------------------------------------------------------------|----------------------------------------------------------------------------------------------------------------------------------------------|---------------------------------|--|--|--|--|--|----|-----|-----|-----|--|-----|--|-----|-----|--|-------------|
| Sasaki et al, Tropical Medicine and International Health, 2010         | Access to a health facility and care-seeking for danger signs in children: before and after a community-based intervention in Lusaka, Zambia | Repeated Cross-sectional design |  |  |  |  |  | NR | N/A | N/A | N/A |  |     |  | N/A | N/A |  | <b>Good</b> |
| Westheimer et al, Journal of Acquired Immune Deficiency Syndrome, 2004 | Acceptance of HIV Testing Among Pregnant Women in Dar-es-Salaam, Tanzania                                                                    | Cross-sectional design          |  |  |  |  |  | NR | N/A | N/A | N/A |  | N/A |  | N/A | N/A |  | <b>Good</b> |
| Nwame et al, Maternal Child Health Journal, 2013                       | Compliance with Emergency Obstetric Care Referrals Among Pregnant Women                                                                      | Cross-sectional study           |  |  |  |  |  |    | N/A | N/A | N/A |  | N/A |  | N/A | N/A |  | <b>Fair</b> |

|                                                                |                                                                                                                                            |                                  |  |  |  |  |    |     |     |     |  |     |  |     |     |  |  |  |      |
|----------------------------------------------------------------|--------------------------------------------------------------------------------------------------------------------------------------------|----------------------------------|--|--|--|--|----|-----|-----|-----|--|-----|--|-----|-----|--|--|--|------|
|                                                                | in an Urban Informal Settlement of Accra, Ghana                                                                                            |                                  |  |  |  |  |    |     |     |     |  |     |  |     |     |  |  |  |      |
| Asundep et al, Journal of Epidemiology and Global Health, 2013 | Determinants of access to antenatal care and birth outcomes in Kumasi, Ghana                                                               | Cross-sectional study            |  |  |  |  | NR | N/A | N/A | N/A |  | N/A |  | N/A | N/A |  |  |  | Good |
| Sasaki et al, J Epidemiol & Comm Health, 2019                  | To examine the association between immunisation coverage and distance to an immunisation service as well as socio-demographic and economic | Repeated cross-sectional surveys |  |  |  |  | NR |     |     | N/A |  |     |  | N/A |     |  |  |  | Good |



|                                                         |                                                                                                                                                           |                                                                          |  |  |  |  |  |  |     |     |     |  |  |     |  |     |     |  |      |
|---------------------------------------------------------|-----------------------------------------------------------------------------------------------------------------------------------------------------------|--------------------------------------------------------------------------|--|--|--|--|--|--|-----|-----|-----|--|--|-----|--|-----|-----|--|------|
| Jennings et al., Maternal and Child Health Journal 2017 | Association of Household Savings and Expected Future Means with Delivery Using a Skilled Birth Attendant in Ghana and Nigeria: A Cross-Sectional Analysis | A multi-country longitudinal study                                       |  |  |  |  |  |  | N/A | N/A | N/A |  |  | N/A |  | N/A | N/A |  | Good |
| Kimani-Murage et al, Int J Dohad, 2016                  | Determine potential effectiveness of the national Community Health Strategy involving home-based counselling visits by                                    | A quasi-experimental study. Data from a longitudinal observational study |  |  |  |  |  |  |     |     |     |  |  |     |  | N/A | N/A |  | Good |

|                                        |                                                                                                                                 |                 |  |  |  |  |    |     |     |     |  |     |  |  |  |             |
|----------------------------------------|---------------------------------------------------------------------------------------------------------------------------------|-----------------|--|--|--|--|----|-----|-----|-----|--|-----|--|--|--|-------------|
|                                        | CHWs on EBF                                                                                                                     |                 |  |  |  |  |    |     |     |     |  |     |  |  |  |             |
| Fotso, Ezeh & Esendi, 2009, Rep Health | Maternal health in resource-poor urban settings: how does women's autonomy influence the utilization of obstetric care services | Cross-sectional |  |  |  |  |    | N/A | N/A | N/A |  |     |  |  |  | <b>Good</b> |
| Govender, SA Fam Practice, 2018        | Obstetric outcomes and antenatal access among adolescent pregnancies in KwaZulu-Natal, South Africa                             | Mixed methods   |  |  |  |  | NR | N/A | N/A | N/A |  | N/A |  |  |  | <b>Fair</b> |

**Supplementary Table 2: Qualitative approach**

| Author, journal, year                                 | Study aim/title of study                                                                                                           | Design/Data source (Cross-sectional ( quanti/quali), longitudinal, prospective, retrospective (including health facilities record review), secondary analysis of data, case-control, RCT, survey (DHS, SPA, MICs ect) | Was there clear statement of aims of the research? | Is the qualitative methodology appropriate? | Was the research design appropriate to address aims of the research? | Was the recruitment strategy appropriate to the aims of the research? | Was the data collected in a way that addresses the research issue? | Has the relationship between researcher and participants been adequately considered? | Has ethical issues been taken into consideration? | Was the data analysis sufficiently rigorous? | Is there a clear statement of findings? | How valuable is the research? | Quality rating |
|-------------------------------------------------------|------------------------------------------------------------------------------------------------------------------------------------|-----------------------------------------------------------------------------------------------------------------------------------------------------------------------------------------------------------------------|----------------------------------------------------|---------------------------------------------|----------------------------------------------------------------------|-----------------------------------------------------------------------|--------------------------------------------------------------------|--------------------------------------------------------------------------------------|---------------------------------------------------|----------------------------------------------|-----------------------------------------|-------------------------------|----------------|
| Ndimbii et al, Sexual & Reproductive Healthcare, 2018 | Access and utilisation of reproductive, maternal, neonatal and child health services among women who inject drugs in coastal Kenya | Qualitative focus group discussion and indepth interviews                                                                                                                                                             |                                                    |                                             |                                                                      |                                                                       |                                                                    |                                                                                      |                                                   |                                              |                                         |                               | Good           |
| Kimani-Murage et al, Mat Child Health, 2015           | Investigates the factors that contribute to poor breastfeeding practices in two urban slums in Nairobi, Kenya, using               | Qualitative: 19 in-depth interviews (IDIs), 10 focus group discussions (FGDs) and 11 key informant interviews (KIIs) in April 2012                                                                                    |                                                    |                                             |                                                                      |                                                                       |                                                                    |                                                                                      |                                                   |                                              |                                         |                               | Good           |
